# Supplementary material for: Association of key species of vaginal bacteria of recurrent bacterial vaginosis patients before and after oral metronidazole therapy with short- and long-term clinical outcomes
Source: PLoS One. 2022 Jul 28;17(7):e0272012. doi: 10.1371/journal.pone.0272012 (PMC9333308; doi:10.1371/journal.pone.0272012)

## S1 Fig. Phylogenetic Trees of 16 individual phylum

### Evolutionary analysis by Maximum Likelihood method

The evolutionary history was inferred by using the Maximum Likelihood method and Tamura-Nei model [1]. The percentage of trees in which the associated taxa clustered together is shown next to the branches. Initial tree(s) for the heuristic search were obtained automatically by applying Neighbor-Join and BioNJ algorithms to a matrix of pairwise distances estimated using the Tamura-Nei model, and then selecting the topology with superior log likelihood value. The tree is drawn to scale, with branch lengths measured in the number of substitutions per site (next to the branches). All positions with less than 95% site coverage were eliminated, i.e., fewer than 5% alignment gaps, missing data, and ambiguous bases were allowed at any position (partial deletion option). Evolutionary analyses were conducted in MEGA X [2]

1. Tamura K. and Nei M. (1993). Estimation of the number of nucleotide substitutions in the control region of mitochondrial DNA in humans and chimpanzees. *Molecular Biology and Evolution* 10:512-526.
2. Kumar S., Stecher G., Li M., Knyaz C., and Tamura K. (2018). MEGA X: Molecular Evolutionary Genetics Analysis across computing platforms. *Molecular Biology and Evolution* 35:1547-1549.

Disclaimer: Although utmost care has been taken to ensure the correctness of the caption, the caption text is provided "as is" without any warranty of any kind. Authors advise the user to carefully check the caption prior to its use for any purpose and report any errors or problems to the authors immediately ([www.megasoftware.net](http://www.megasoftware.net)). In no event shall the authors and their employers be liable for any damages, including but not limited to special, consequential, or other damages. Authors specifically disclaim all other warranties expressed or implied, including but not limited to the determination of suitability of this caption text for a specific purpose, use, or application.

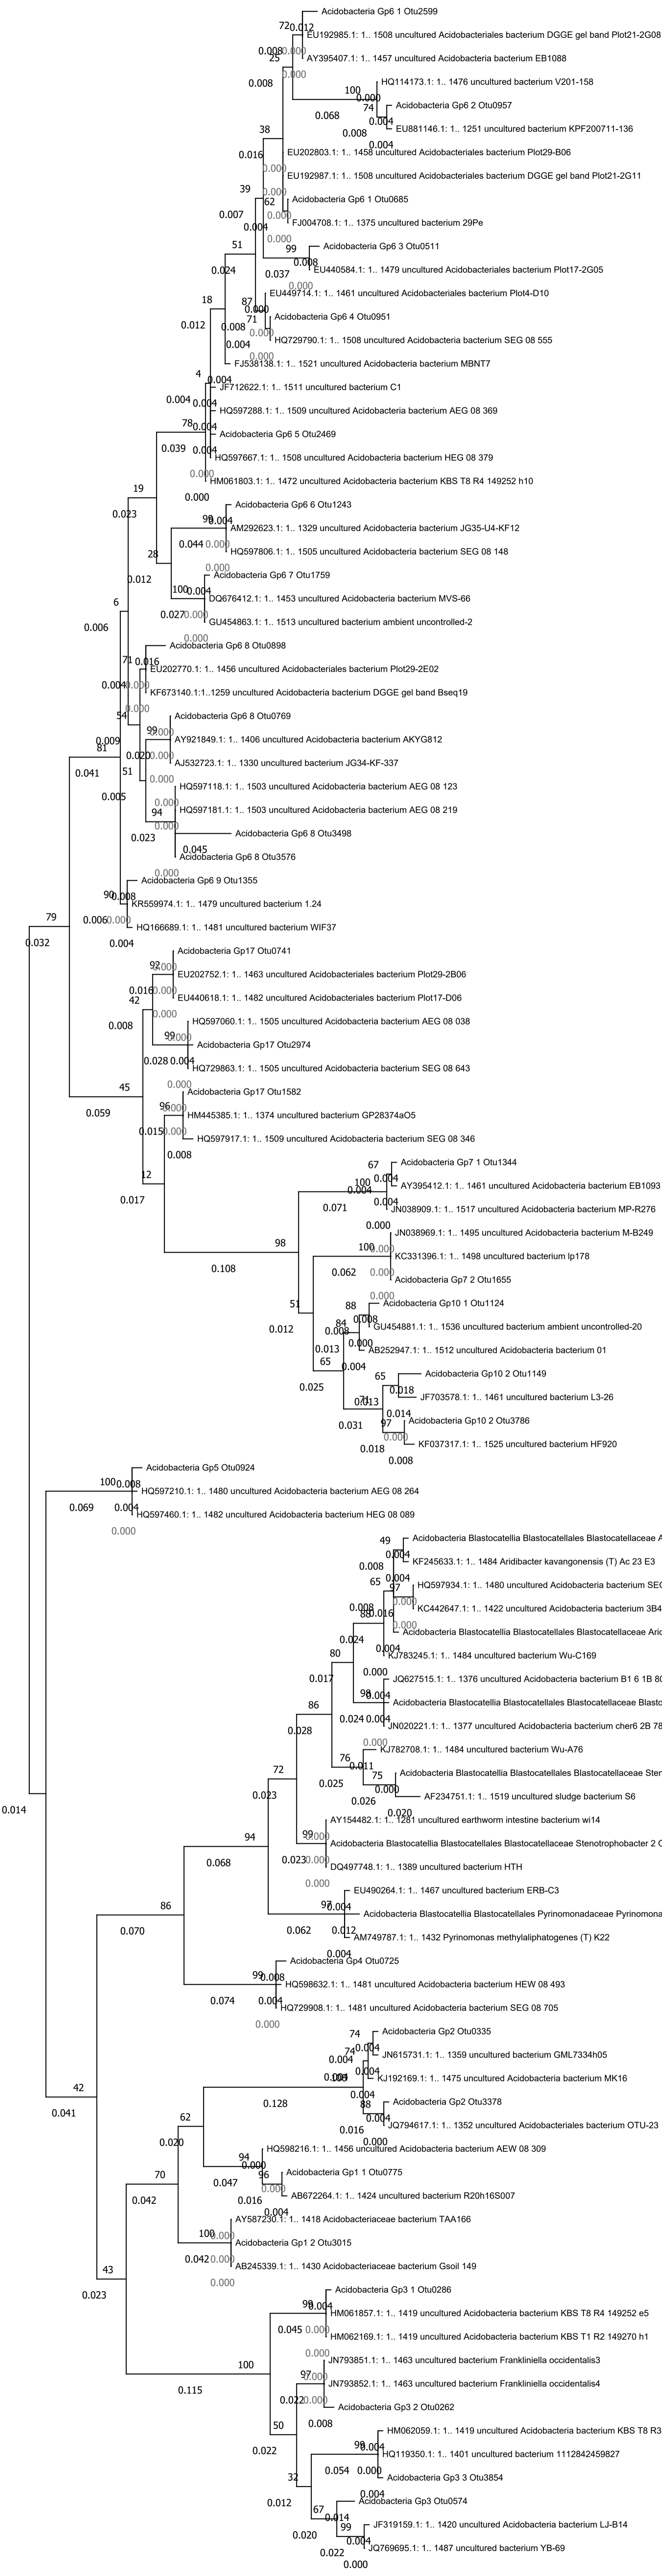

Figure S1A. *Acidobacteria* Phylogenetic tree

AF29608.1: 1. 734 Corynebacterium rigellii V17.2012172

CP12342.1 complement(793524..795045) Corynebacterium negeli FJDD 83445

AF485448.1: 1. 1457 Corynebacterium negeli CT098-1967

AF537602.1: 1. 1454 Corynebacterium negeli National Microbiology Laboratory Special Bacteriology identifier 99-0185

Y145181.1: 1. 1383 Corynebacterium pseudoginzaii dmmz 2415

Actinobacteriota Actinobacteria Mycobacteriales Corynebacteriaceae Corynebacterium negeli Otu0408

Actinobacteriota Actinobacteria Mycobacteriales Corynebacteriaceae Corynebacterium pseudoginzaii Otu0069

X81905.1: 1. 1405 Corynebacterium sp. CDC G4330

X81872.1: 1. 1430 Corynebacterium pseudoginzaii NCTC 11860

GU238412.1: 1. 1448 Corynebacterium sp. NML 86-0116

KF925986.1: 1. 1722 Corynebacterium sp. V17.2011353

KP232870.1: 1. 1328 Corynebacterium sp. SS2

X96497.1: 1.1483 Corynebacterium coyleae (T) type strain: DSM 44184 = CGU 35014 = DMWZ 214

Actinobacteriota Actinobacteria Mycobacteriales Corynebacteriaceae Corynebacterium coyleae\* Otu0095

AF244774.1: 1. 1221 Corynebacterium sp. 2002-79006

AF537582.1: 1. 1453 Corynebacterium coyleae National Microbiology Laboratory Special Bacteriology identifier 97-0171

AF537601.1: 1. 1468 Corynebacterium mucifaciens National Microbiology Laboratory Special Bacteriology identifier 97-0160

KF925897.1: 1. 701 Corynebacterium coyleae V17.2011152

X84253.1: 1.1392 Corynebacterium genitalium NCTC 11859

Actinobacteriota Actinobacteria Mycobacteriales Corynebacteriaceae Corynebacterium tuscanense Otu0093

AY67186.1: 1. 1502 Corynebacterium tuscanense (T) ISS-5309 ATCC BAA-1141 CCUG 61321

KF280284.1: 1. 1228 Corynebacterium tuscanense DNF0037

X238409.1: 1. 1445 Corynebacterium sp. NML 93-0481

KJ081507.1: 1. 730 Corynebacterium sp. 201263693

Actinobacteriota Actinobacteria Mycobacteriales Corynebacteriaceae Corynebacterium glucuronilyticum Otu0185

X84375.1: 1.1323 Corynebacterium glucuronilyticum QF 838 (ACSM 44120)

X86688.1: 1.1459 Corynebacterium glucuronilyticum COR 252

AJ277970.1: 1.1392 Corynebacterium glucuronilyticum COR 252

AF537585.1: 1. 1461 Corynebacterium glucuronilyticum National Microbiology Laboratory Special Bacteriology identifier 86-0013

Actinobacteriota Actinobacteria Mycobacteriales Corynebacteriaceae Corynebacterium thomsonii\* Otu0108

Y09655.1: 1. 1466 Corynebacterium sundsvallense (T) CCUG 36622

AF010474.1: 1. 1472 Corynebacterium thomsonii

AF537605.1: 1. 1445 Corynebacterium sundsvallense National Microbiology Laboratory Special Bacteriology identifier 93-0639

AF537606.1: 1. 1467 Corynebacterium sundsvallense National Microbiology Laboratory Special Bacteriology identifier 99-0121

AF537607.1: 1. 1461 Corynebacterium thomsonii National Microbiology Laboratory Special Bacteriology identifier 97-0130

AJ438046.1: 1. 1512 Corynebacterium tuberculoostearicum CIP102211

AJ438047.1: 1. 1512 Corynebacterium tuberculoostearicum CIP102214

AJ438048.1: 1. 1512 Corynebacterium tuberculoostearicum CIP102076

AJ438041.1: 1. 1512 Corynebacterium tuberculoostearicum CIP102857

X80498.1: 1. 1393 Corynebacterium sp. CDC G5840

Actinobacteriota Actinobacteria Mycobacteriales Corynebacteriaceae Corynebacterium tuberculoostearicum Otu0089

CP004085.1 complement(1288148..1288657) Corynebacterium urealyticum DSM 7111

CP004085.1 complement(1819960..1821169) Corynebacterium urealyticum DSM 7111

CP004085.1: 1.138972.140478 Corynebacterium urealyticum DSM 7111

AM942444.1 complement(1853332..1854780) Corynebacterium urealyticum DSM 7109

Actinobacteriota Actinobacteria Mycobacteriales Corynebacteriaceae Corynebacterium urealyticum Otu0517

CP001601.1: 1.1815367.816884 Corynebacterium aurimucosum ATCC 700975 DSM 44827 ATCC 700975

CP001601.1 complement(2332091..2333608) Corynebacterium aurimucosum ATCC 700975 DSM 44827 ATCC 700975

AF033314.1: 1. 1428 Corynebacterium sp. CDC B8037

AY227208.1: 1. 1441 Corynebacterium aurimucosum CN-3415

AJ15981.1: 1. 1468 Corynebacterium aurimucosum MIMB R-222

Actinobacteriota Actinobacteria Mycobacteriales Corynebacteriaceae Corynebacterium aurimucosum Otu0064

Actinobacteriota Actinobacteria Mycobacteriales Corynebacteriaceae Corynebacterium genitalium\* Otu0257

U87820.1: 1.1443 Corynebacterium genitalium ATCC 33033

AY581881.1: 1. 1472 Corynebacterium sp. 25850

Actinobacteriota Actinobacteria Mycobacteriales Corynebacteriaceae Corynebacterium jeikeium Otu0550

CF931997.1: 1472784..474290 Corynebacterium jeikeium K411 K411 = NCTC 11915

X82062.1: 1.1333 Corynebacterium jeikeium CIP 103337T

X84250.1: 1.1404 Corynebacterium jeikeium (T) NCTC 11913

AY581882.1: 1. 1469 Corynebacterium sp. 59614

CF931997.1: 108684..110210 Corynebacterium jeikeium K411 K411 = NCTC 11915

AF537603.1: 1. 1465 Corynebacterium simulans National Microbiology Laboratory Special Bacteriology identifier 81-0613

AF537604.1: 1. 1469 Corynebacterium simulans National Microbiology Laboratory Special Bacteriology identifier 00-0186

X84442.1: 1. 1477 Corynebacterium striatum (T) NCTC 794

X81906.1: 1.1324 Corynebacterium xerosis IAM 12431

X81910.1: 1.1324 Corynebacterium striatum CIP 81.15T

Actinobacteriota Actinobacteria Mycobacteriales Corynebacteriaceae Corynebacterium striatum\* Otu0163

Actinobacteriota Actinobacteria Mycobacteriales Lawsonellaceae Lawsonella clevelandensis Otu0084

XJ977776.1: 1. 1445 Lawsonella clevelandensis (T) X1036

KC689624.1: 1. 1454 Corynebacterineae bacterium NML 120705

KM401816.1: 1. 1444 Corynebacterineae bacterium X1036

CP009312.1 complement(554489..556018) Corynebacteriales bacterium X1036

CP009312.1: 1.1832000..1834429 Corynebacteriales bacterium X1036

Actinobacteriota Actinobacteria Mycobacteriales Corynebacteriaceae Corynebacterium amycolatum\* Otu0106

XJ2050.1: 1.1322 Corynebacterium amycolatum CIP 52.13

XJ2057.1: 1.1401 Corynebacterium amycolatum (T) CIP 103452T

AY230773.1: 1. 1398 Corynebacterium sp. Smarlab BioMed-2301292 Smarlab BioMed 2301292

AY831728.1: 1. 1420 Corynebacterium amycolatum

ICQ408842.1: 1. 831 Corynebacterium amycolatum YNLB30-34-191104

Actinobacteriota Actinobacteria Mycobacteriales Corynebacteriaceae Corynebacterium kroppenstedtii Otu0330

Y10077.1: 1. 1400 Corynebacterium kroppenstedtii (T) CCUG 35717

AY524774.1: 1. 1442 Corynebacterium kroppenstedtii VAI719.2000

AF537598.1: 1. 1470 Corynebacterium kroppenstedtii National Microbiology Laboratory Special Bacteriology identifier 00.0244

AY581885.1: 1. 1455 Corynebacterium sp. 89349

CP001620.1: 1.12976..114476 Corynebacterium kroppenstedtii DSM 44385

Actinobacteriota Actinobacteria Mycobacteriales Mycobacteriaceae Mycobacterium vaccae\* Otu0431

AF470470.1: 1. 1053 actinobacterium S-A(1)-8A

X93184.1: 1.1459 Mycobacterium hodleri (T) DSM 44183

AF460591.1: 1. 1439 Mycobacterium vaccae (T) ATCC 15483

AB209700.1: 1. 610 Mycobacterium sp. SSR89-6

KM096754.1: 1. 1393 Mycobacterium vaccae 12/13

EF918707.1: 1. 855 Nocardioides sp. DJH452

Actinobacteriota Actinobacteria Propionibacteriales Nocardioidaceae Aeromicrobium pontii Otu0320

AF18711.1: 1. 835 Aeromicrobium sp. DJH457

AM78683.1: 1. 1336 Aeromicrobium pontii (T) type strain: HSW-1

KF815228.1: 1. 695 Aeromicrobium pontii B20u-2

LN830920.1: 1. 1101 Aeromicrobium sp. SeC676b

Actinobacteriota Actinobacteria Geodermatophilales Geodermatophilaceae Blastococcus aggregatus Otu0441

AJ430193.1: 1.1471 Blastococcus aggregatus DSM 47257

X92364.1: 1.1477 Geodermatophilus GIS leachiae of a landfill Vancouver Canada

AJ16573.1: 1.1475 Blastococcus sp. BC321

L40614.1: 1.1441 Blastococcus aggregatus

FJ214361.1: 1. 1414 Blastococcus sp. YM 65287

Actinobacteriota Actinobacteria Actinomycetales Actinomycetaceae Pauljensenia hongkongensis Otu0059

AF433168.1: 1. 1425 Pauljensenia hongkongensis (T) HKU8

XJ20825.1: 1. 1476 Altonocardiopsis opalescens (T) 110A-01259

Actinobacteriota Actinobacteria Micromonosporales Micromonosporaceae Spirilliplanes yamanashiensis Otu0461

ALC066770.1: 1. 1465 Spirilliplanes yamanashiensis JCM 10032

EF3912.1: 1. 1470 Spirilliplanes yamanashiensis (T) IPO 15628 YU 127-1

GU629199.1: 1. 1440 Micromonospora sp. S-1-48

AB454379.1: 1. 1449 Plantactinospira siamensis (T) CM2-8

KC856648.1: 1. 1371 Micromonospora sp. WMMB 418

X76564.1: 1.1450 Brevibacterium casei NCDO 2048

AJ251418.1: 1.1423 Brevibacterium israel (T) DSM 20657

X76565.1: 1.1482 Brevibacterium epidermidis (T) NCDO 2286

X83813.1: 1. 1485 Brevibacterium idinudum DSM 20627

Actinobacteriota Actinobacteria Micrococcales Brevibacteriaceae Brevibacterium idinudum\* Otu0396

X76567.1: 1.1438 Brevibacterium idinudum NCDO 613

AJ251463.1: 1.1412 Brevibacterium paucivorum (T) CF 62

EU086796.1: 1. 1444 Brevibacterium paucivorum 28

X93594.1: 1.1404 Brevibacterium mcdanieli (T) ATCC 49303

Actinobacteriota Actinobacteria Micrococcales Brevibacteriaceae Brevibacterium paucivorum\* Otu0509

Actinobacteriota Actinobacteria Micrococcales Brevibacteriaceae Brevibacterium ravenburgense Otu0171

EU096793.1: 1. 1372 Brevibacterium sp. S56

EU096793.1: 1. 1470 Brevibacterium ravenburgense (T) 20

EU096808.1: 1. 1449 Brevibacterium ravenburgense 744

EU688814.1: 1. 1450 Brevibacterium sp. S401308

K081489.1: 1. 745 Brevibacterium ravenburgense 201221490-2

FJ200385.1: 1. 1392 Dermabacter hominis 3361BRJ

JX435046.1: 1. 1323 Dermabacter hominis 362-2

EU888884.1: 1. 931 Dermabacter hominis FR2 MS10c

AY561545.1: 1. 985 Dermabacter sp. 9c-4

Actinobacteriota Actinobacteria Micrococcales Dermabacteraceae Dermabacter hominis Otu0337

AF343728.1: 1. 1468 Dermabacter hominis

Actinobacteriota Actinobacteria Micrococcales Intrasporangiaceae 1 Otu0278

AM845547.1: 1. 1072 Tetrasphaera sp. MOLA 314

FJ796074.1: 1. 1441 Ornithinibacter aureus (T) HB9001

AB522644.1: 1. 1455 marine actinobacterium YM26-77

FJ482120.1: 1. 743 bacterium SRU 17

HM113577.1: 1. 746 Intrasporangiaceae bacterium O1x7SA26A F10

Actinobacteriota Actinobacteria Micrococcales Cytotholacaceae Cytotholacaceae sedentarius Otu0701

CP003230.1: 1. 1046 Cytotholacaceae sedentarius LAMA 951

XJ7755.1: 1. 1489 Cytotholacaceae sedentarius DSM

DQ447775.1: 1.1288 Cytotholacaceae sedentarius M5FC-3MS-R-5

EU090136.1: 1. 1423 Cytotholacaceae sedentarius B-G-TS46

HM629570.1: 1. 1285 Cytotholacaceae sedentarius B-G-TS46

Actinobacteriota Actinobacteria Actinomycetales Actinomycetaceae Actinobaculum massiliense Otu0154

FJ711191.1: 1. 1473 Actinobaculum massiliense NML 070284

FJ390117.1: 1. 1228 Actinobaculum massiliense 8

FJ390118.1: 1. 1228 Actinobaculum massiliense 232

FJ390119.1: 1. 1211 Actinobaculum massiliense 252

FJ390120.1: 1. 1235 Actinobaculum massiliense 85

FN562995.1: 1. 1256 Arcanobacterium phocae DSM 10003

FR749960.1: 1. 1259 Arcanobacterium phocae (T) type strain: DSM 10002

XJ97049.1: 1.1416 Arcanobacterium phocae DSM 10004

EF061225.1: 1. 1471 Arcanobacterium sp. NML 06501

XJ262685.1: 1. 1373 Actinomycetaceae bacterium 55-BMB

Actinobacteriota Actinobacteria Actinomycetales Actinomycetaceae Arcanobacterium phocae Otu0338

Actinobacteriota Actinobacteria Actinomycetales Actinomycetaceae Arcanobacterium haemolyticum Otu0085

LJX104007.1: 1. 1388 Arcanobacterium sp. S3PF19

EU409524.1: 1. 1309 Arcanobacterium haemolyticum 6879

CP002045.1: 1.493734..495263 Arcanobacterium haemolyticum DSM 20595

CP002045.1 complement(1073244..1074774) Arcanobacterium haemolyticum DSM 20595

CP002045.1 complement(1814607..1816137) Arcanobacterium haemolyticum DSM 20595

KJ662671.1: 1. 1430 Pseudocylindrobacter sp. SAE

EU648112.1: 1. 467 Microbacteriaceae bacterium MUJ1

KC297222.1: 1. 1215 Pseudocylindrobacter sp. DNF00083

FJ379551.1: 1. 1445 Pseudocylindrobacter sp. Timone

Actinobacteriota Actinobacteria Micrococcales Microbacteriaceae Pseudocylindrobacter 1 Otu0230

HM688074.1: 1. 1343 Microbacteriaceae bacterium 0001-146

Actinobacteriota Actinobacteria Micrococcales Microbacteriaceae Microbacterium korseae Otu0106

DQ232611.2: 1.1500 Agrococcus sp. DNPFC10334

AY962574.1: 1. 1438 Microbacterium korseae (T) JSS3-2

AY962575.1: 1. 1433 Microbacterium korseae JSS3-5

EU419907.1: 1. 1322 Microbacterium korseae RW20

HQ169192.1: 1. 1360 bacterium B-Cornad21

EF204382.1: 1. 835 Kocuria rhizophila H23

LN599841.1: 1. 1355 Kocuria salicicola G1

EF204381.1: 1. 830 Kocuria rhizophila F144

AB192355.1: 1. 648 Kocuria sp. AM16

AF542074.1: 1. 1333 Kocuria varians ATCC 15306

Actinobacteriota Actinobacteria Micrococcales Micrococaceae Kocuria varians\* Otu0312

Actinobacteriota Actinobacteria Micrococcales Micrococaceae Rothia kristinae Otu0536

X80748.1: 1.1475 Rothia kristinae (T) DSM 20032

AF323746.1: 1. 768 Kocuria kristinae BK3721.00

AY327845.1: 1. 912 Streptomyces sp. MSU 2110 p25-2-4

AY241411.1: 1. 694 Micrococcus sp. UST010820-01

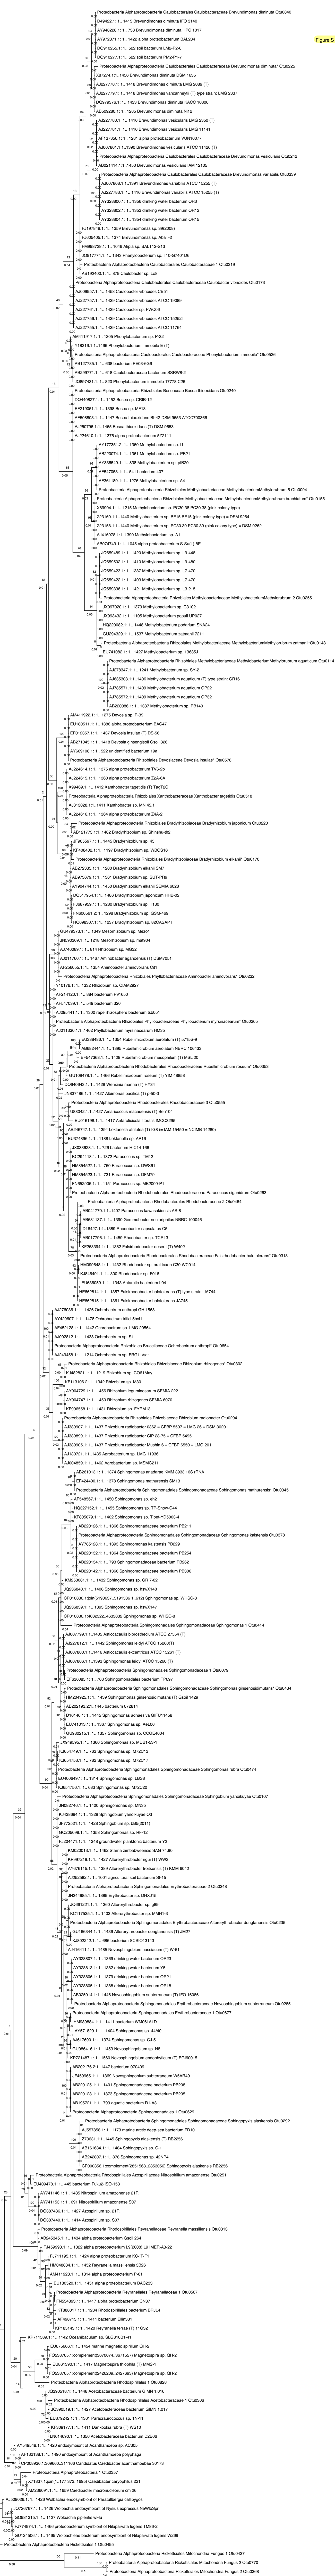

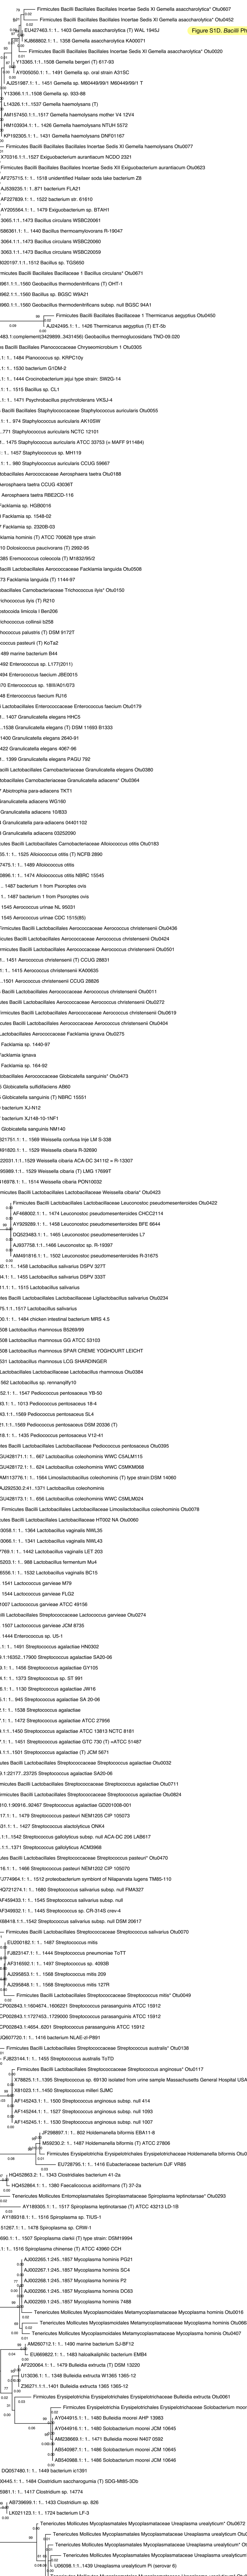

Figure S1D. *Bacilli* Phylogenetic Tree (excluding *Lactobacillus* species)

0.050

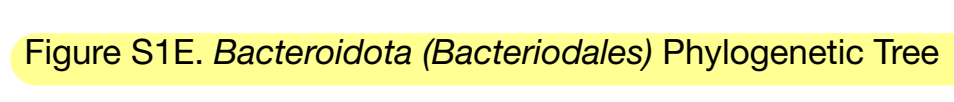

Figure S1F. *Bacteroidota* Phylogenetic Tree (excluding *Bacteroidales*)

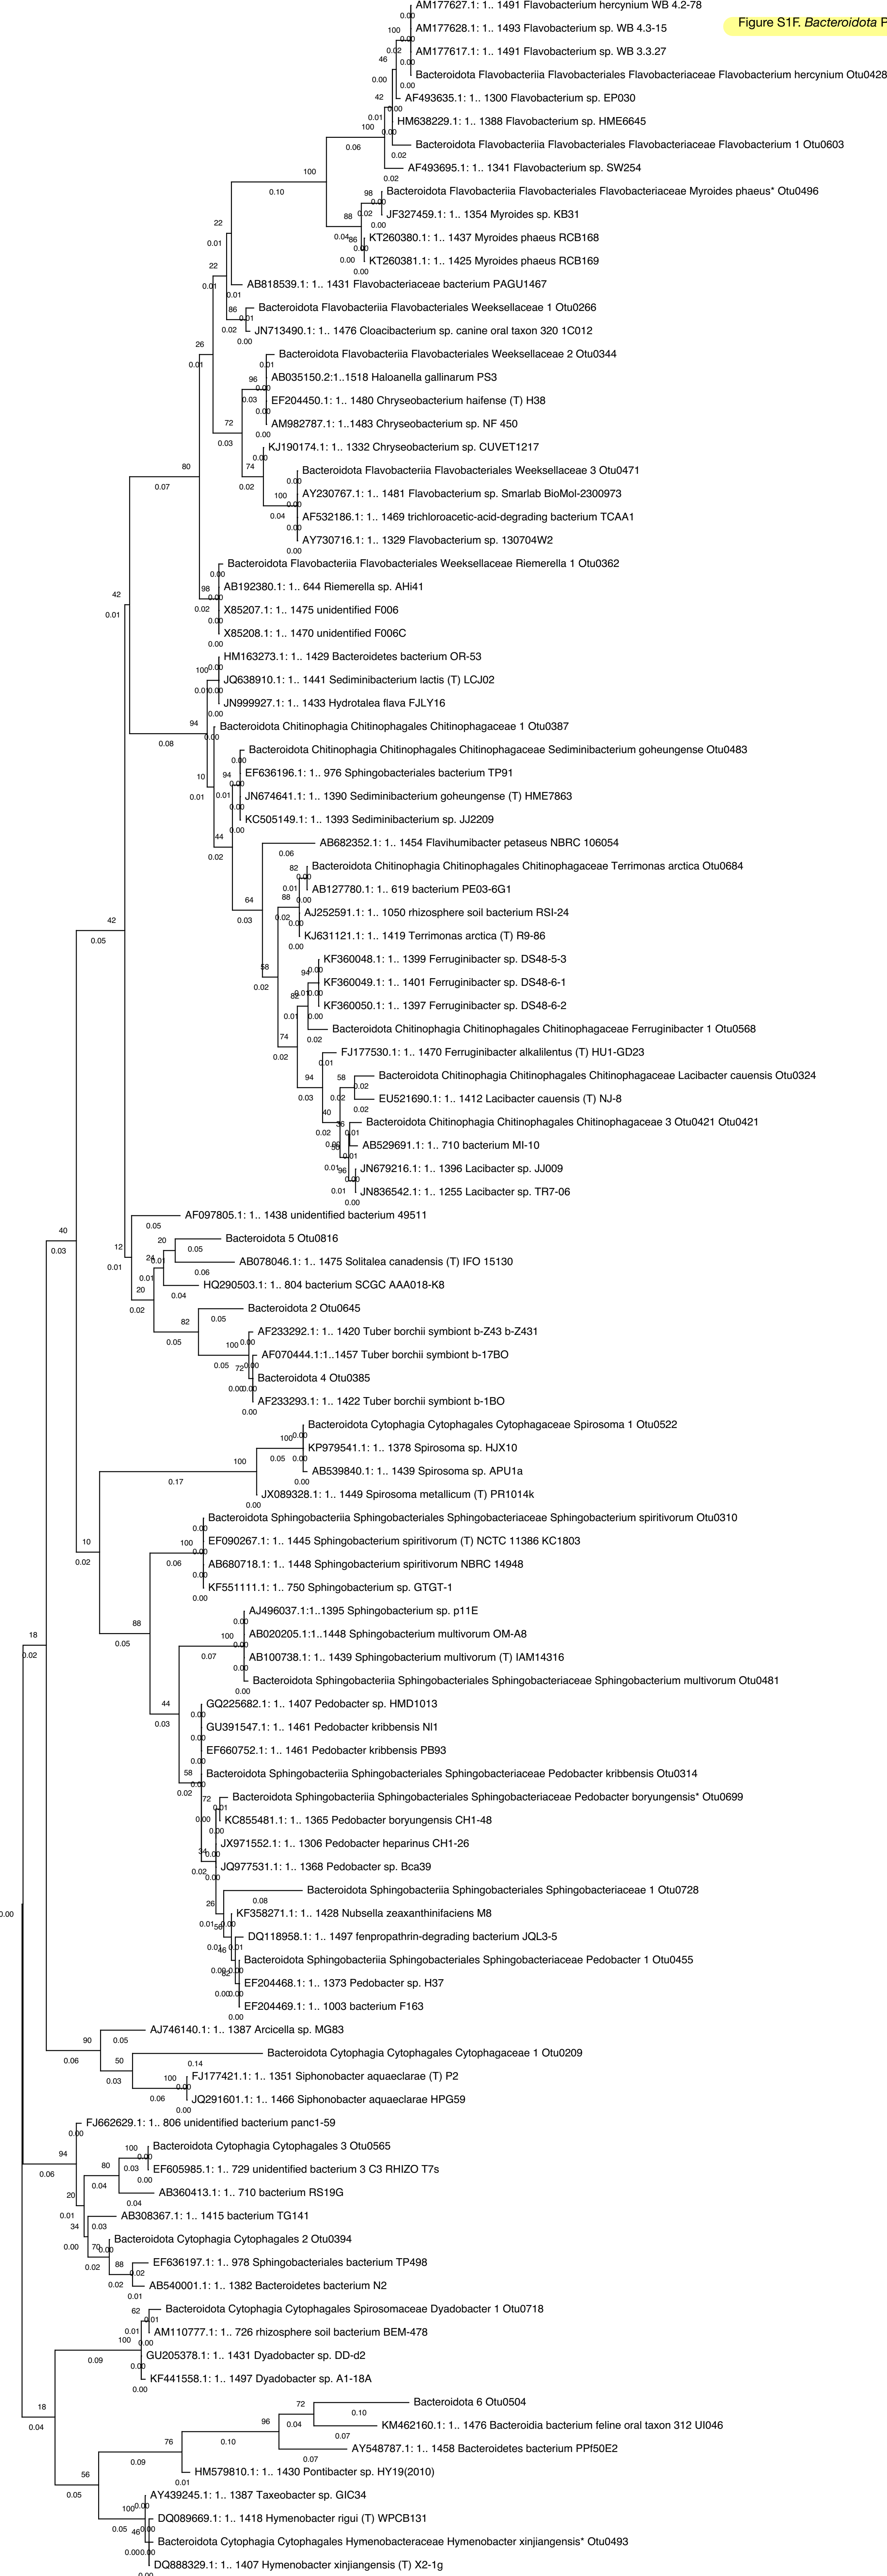

0.10

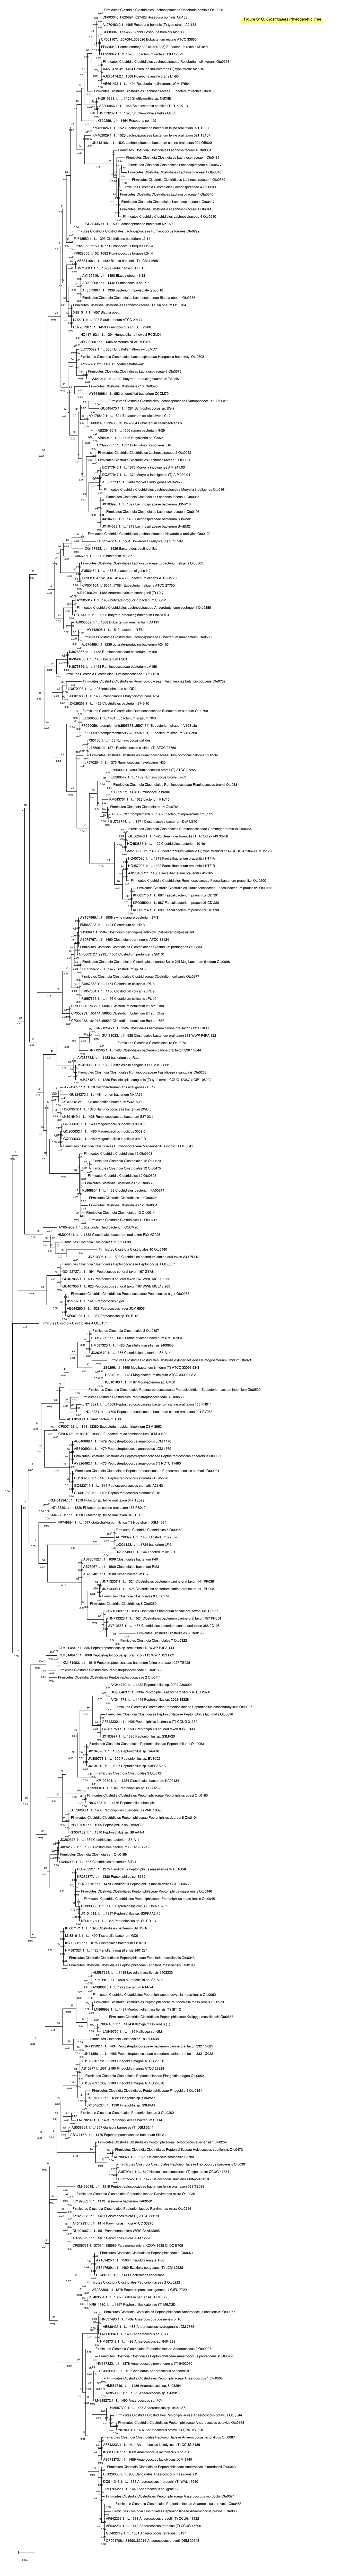

Figure S1H. Clostridiales Phylogenetic Tree (excluding Peptococcus species and Lachnospiraceae species)

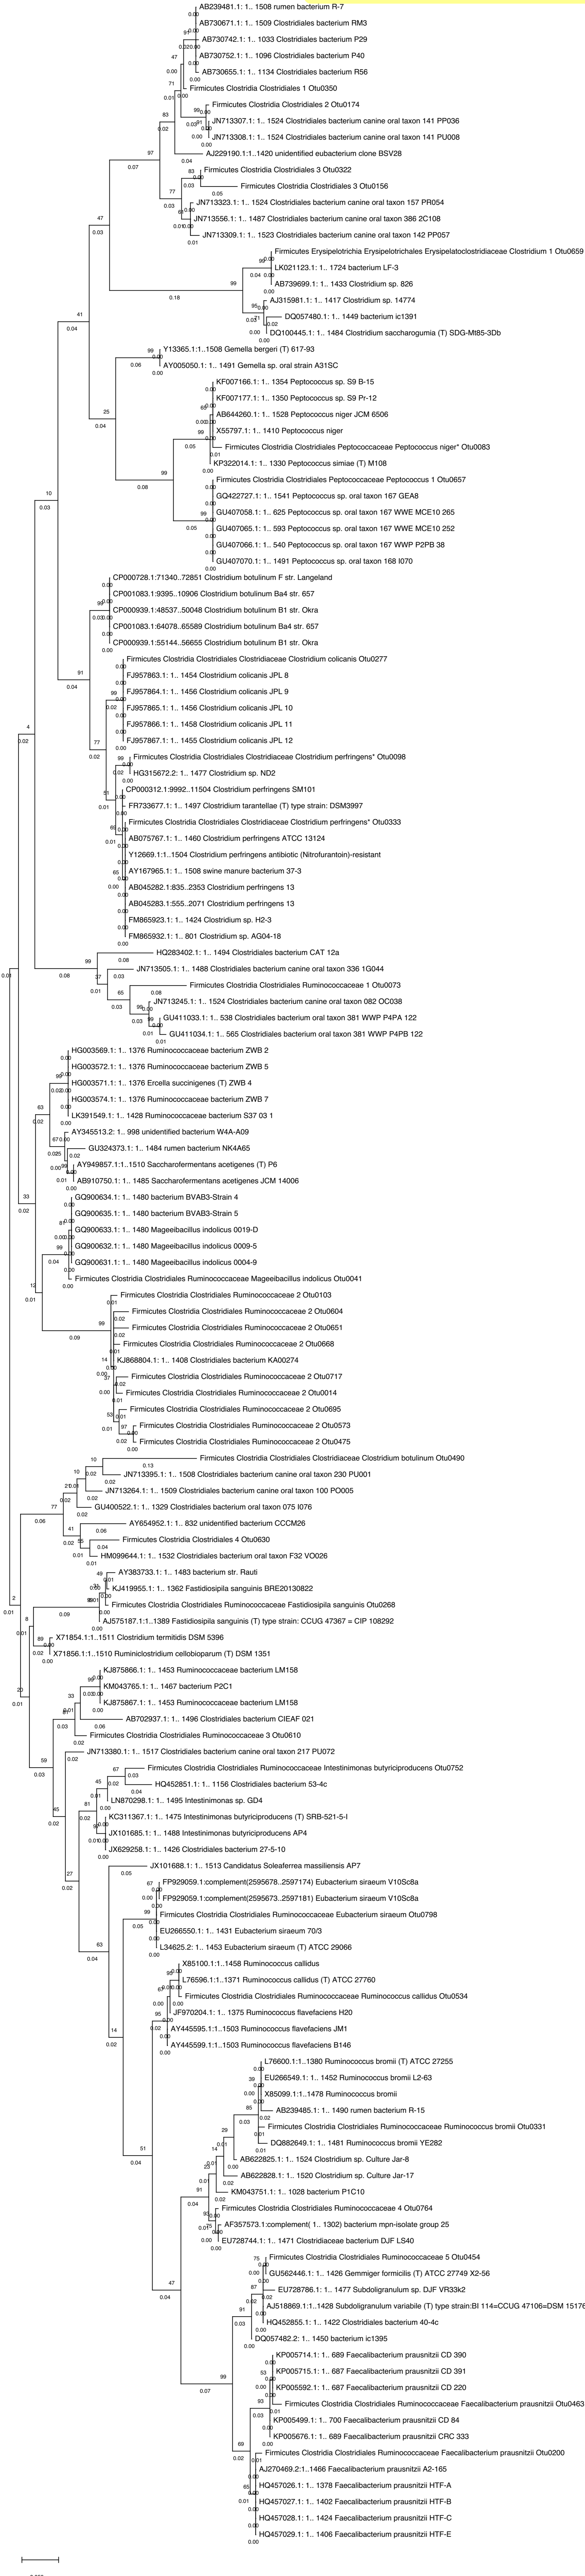

0.050

Figure S1I. *Fusobacteria* Phylogenetic Tree

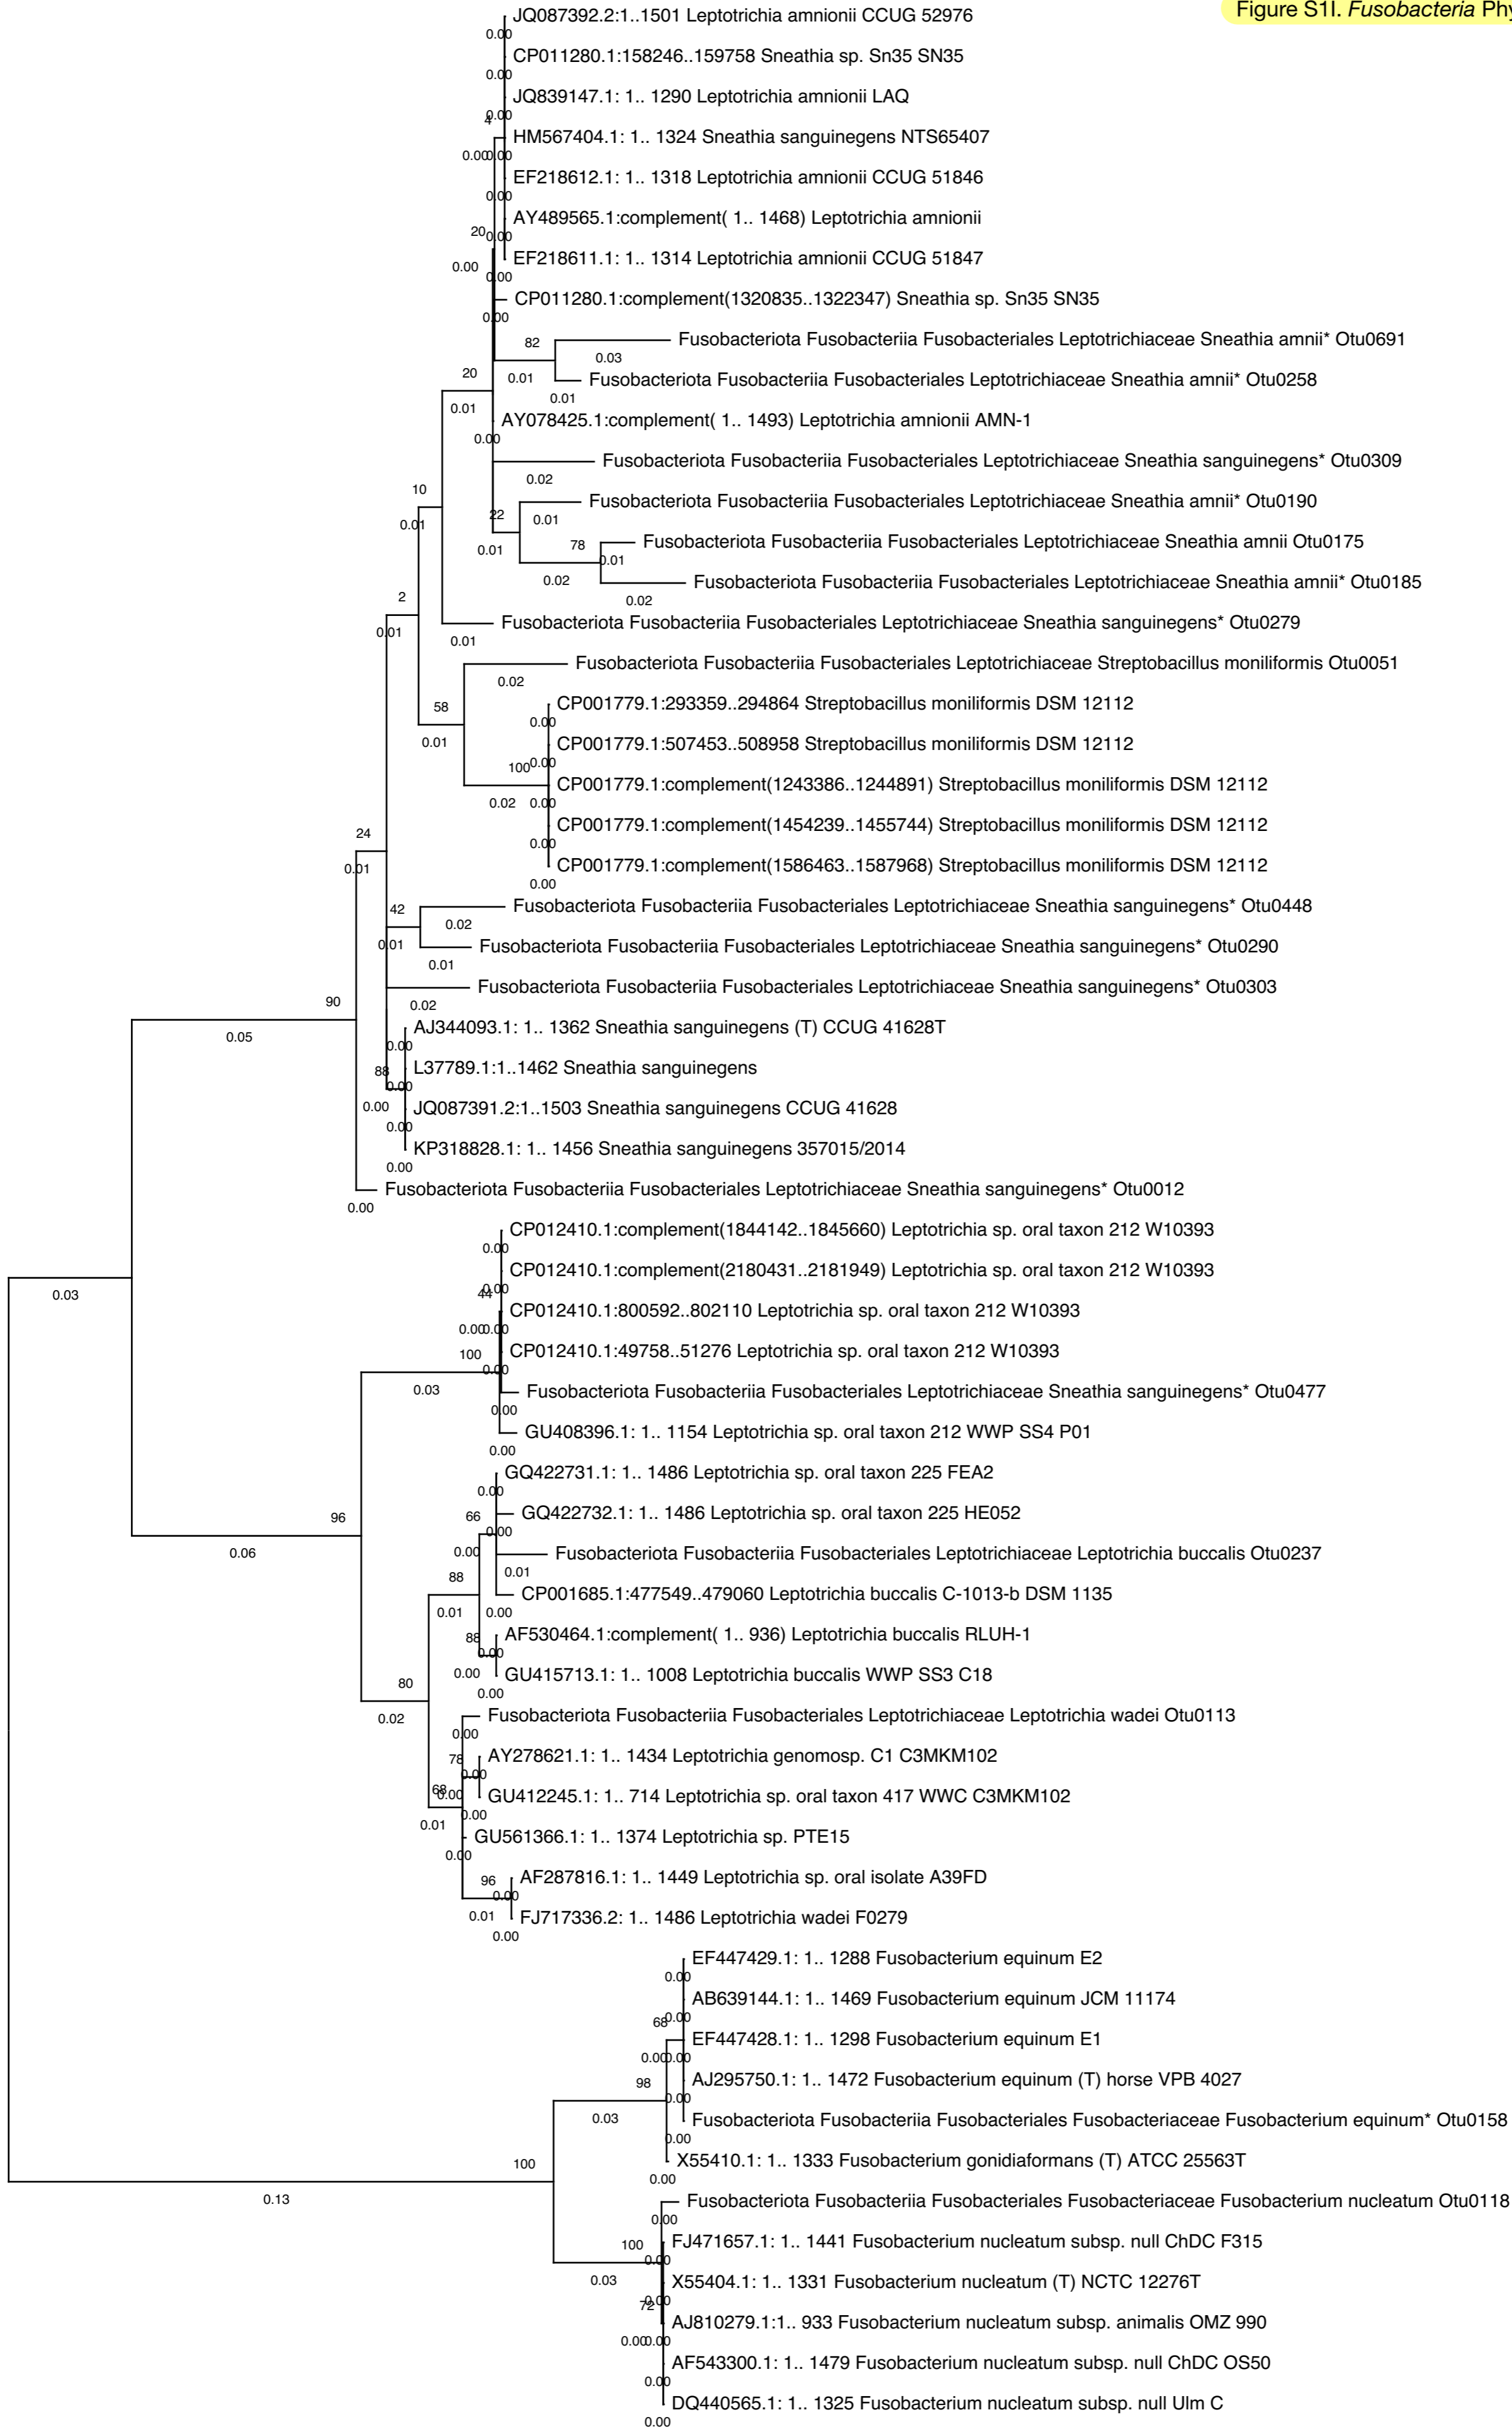

0.050

Figure S1J. *Gardnerella* Phylogenetic Tree

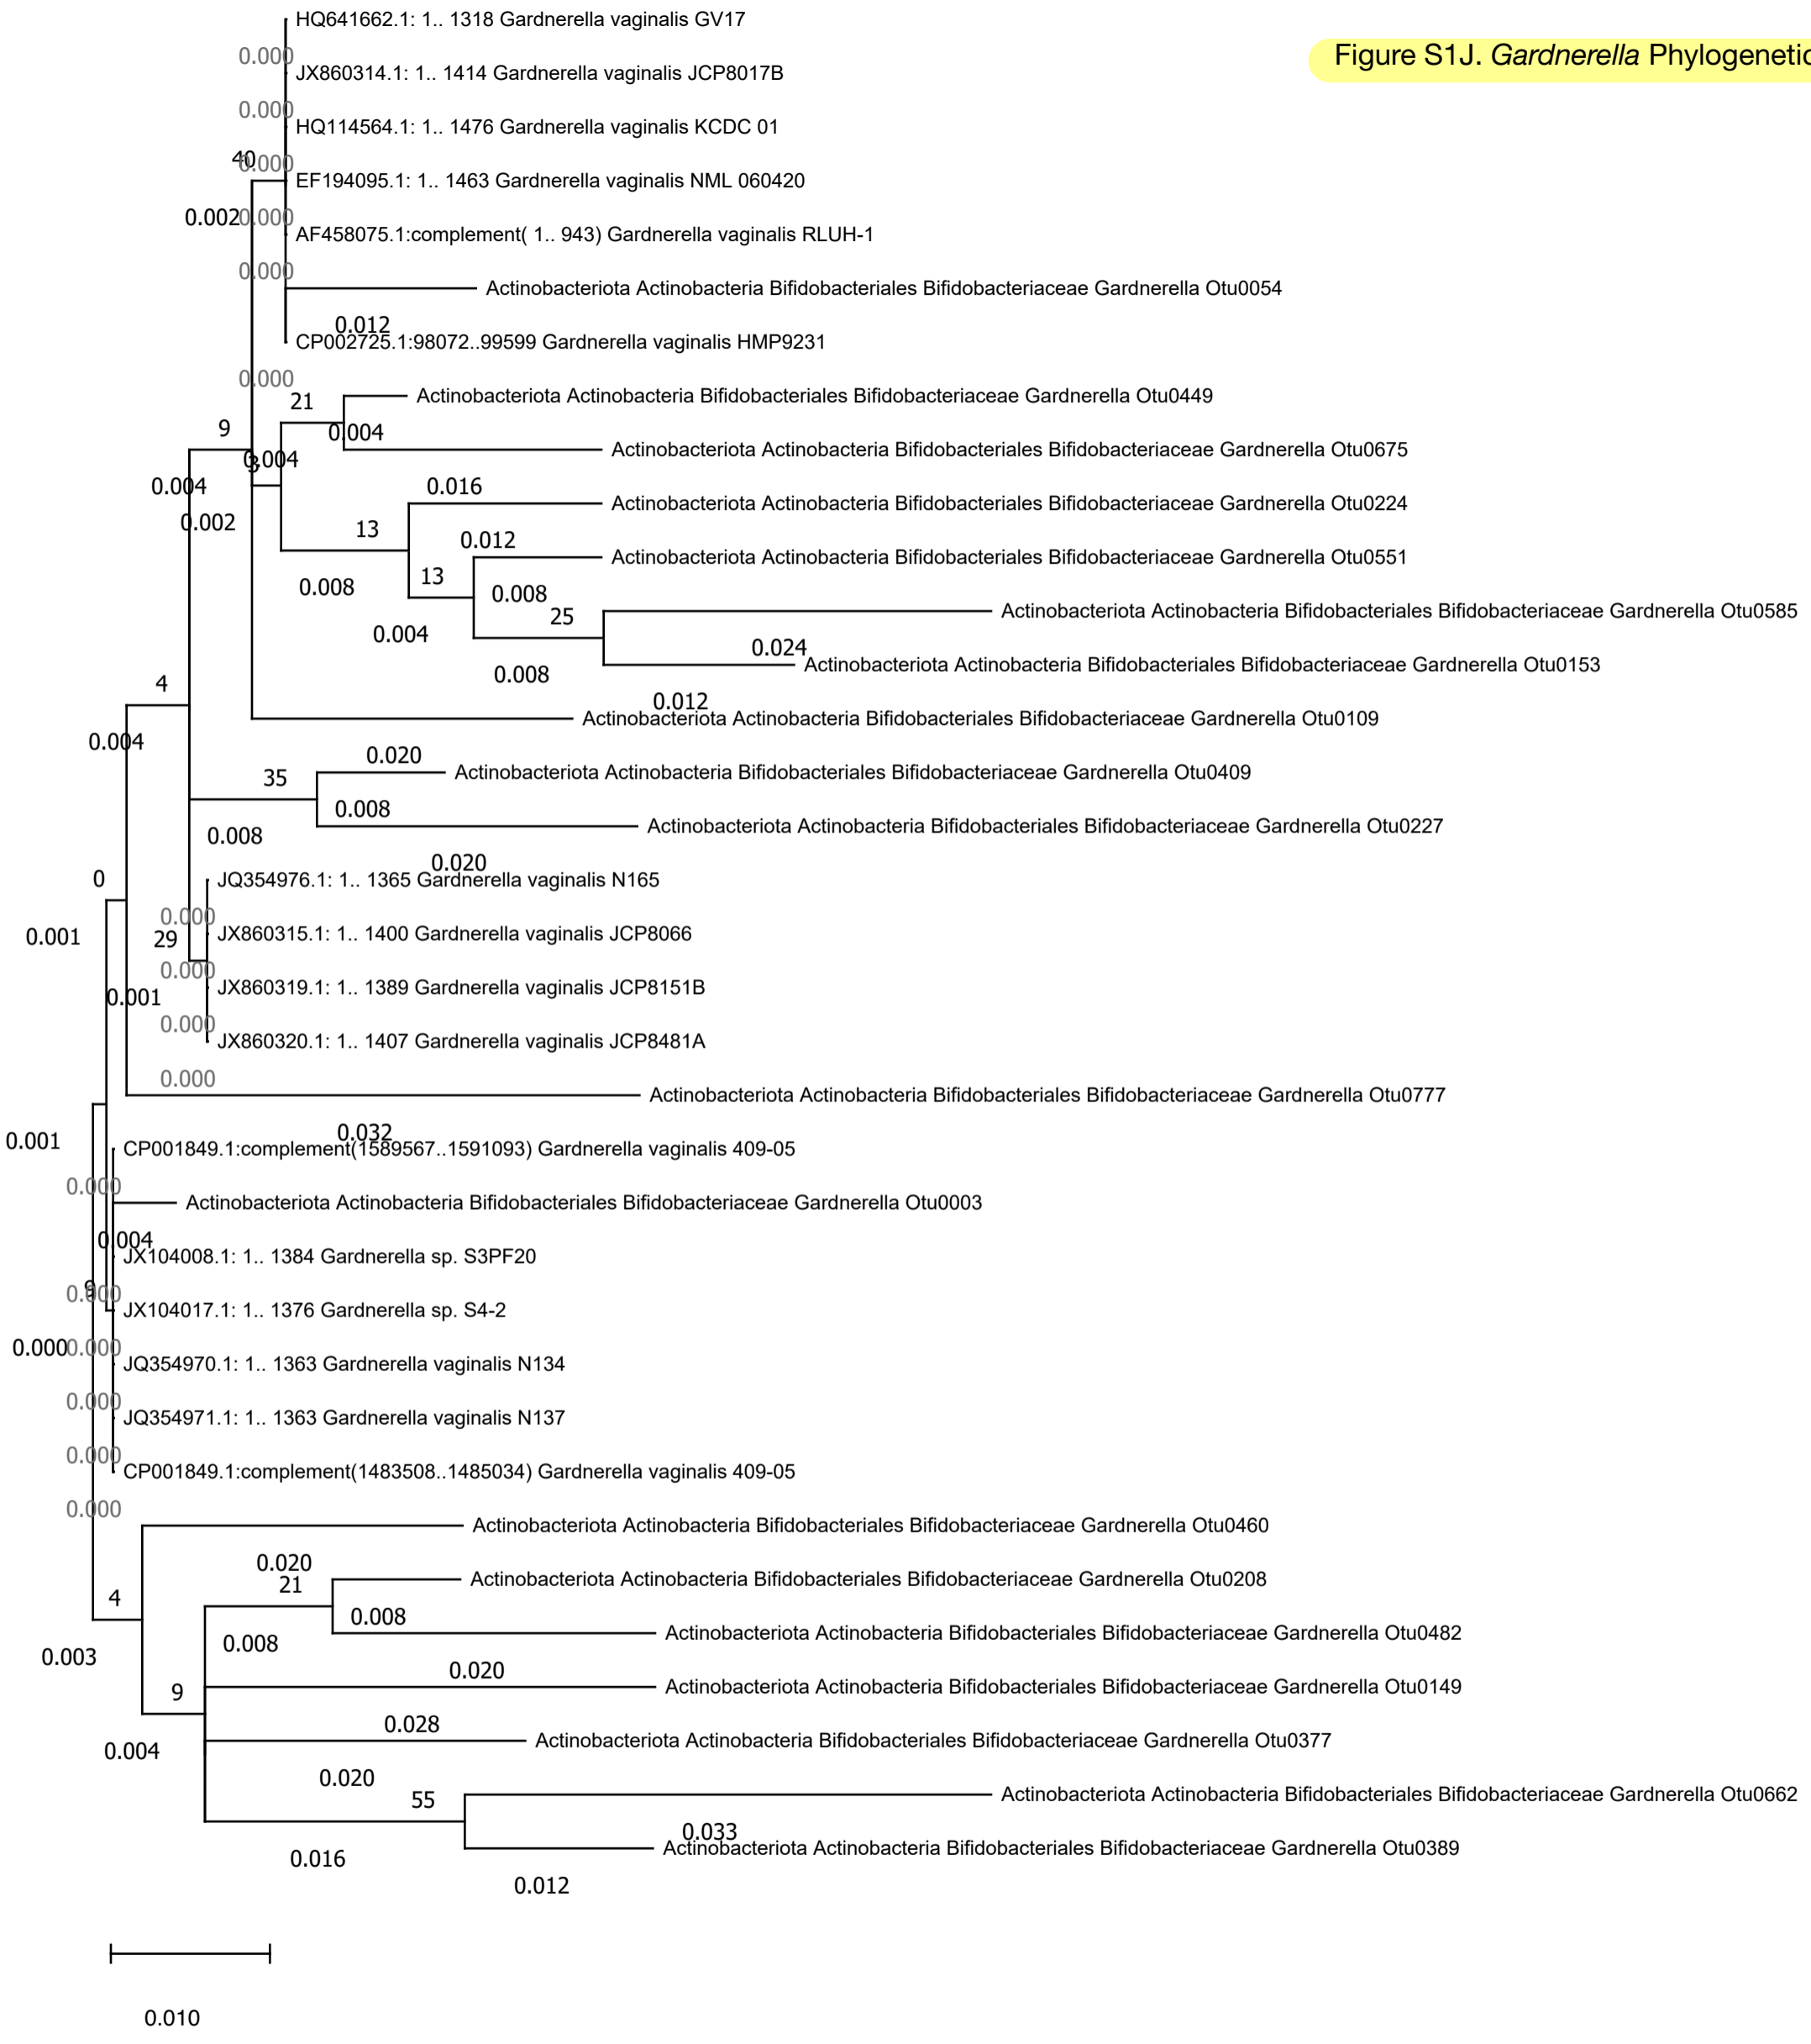

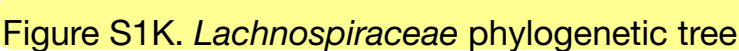

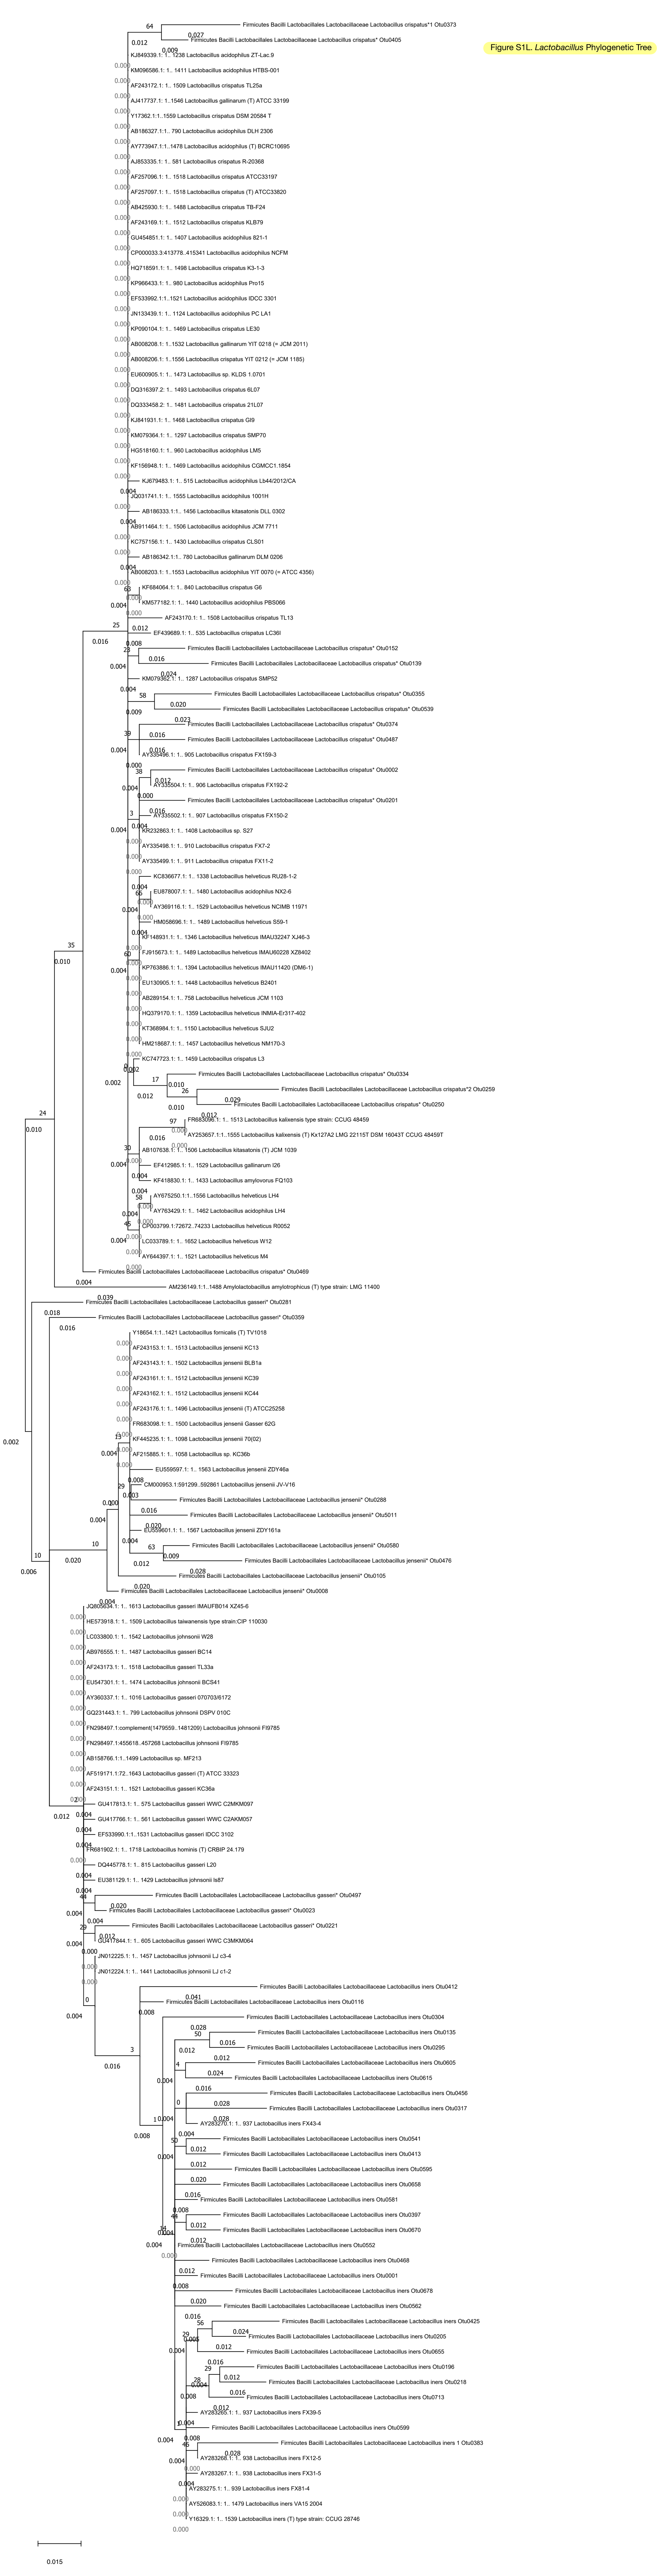

Figure S1M. Miscellaneous Phylogenetic Tree

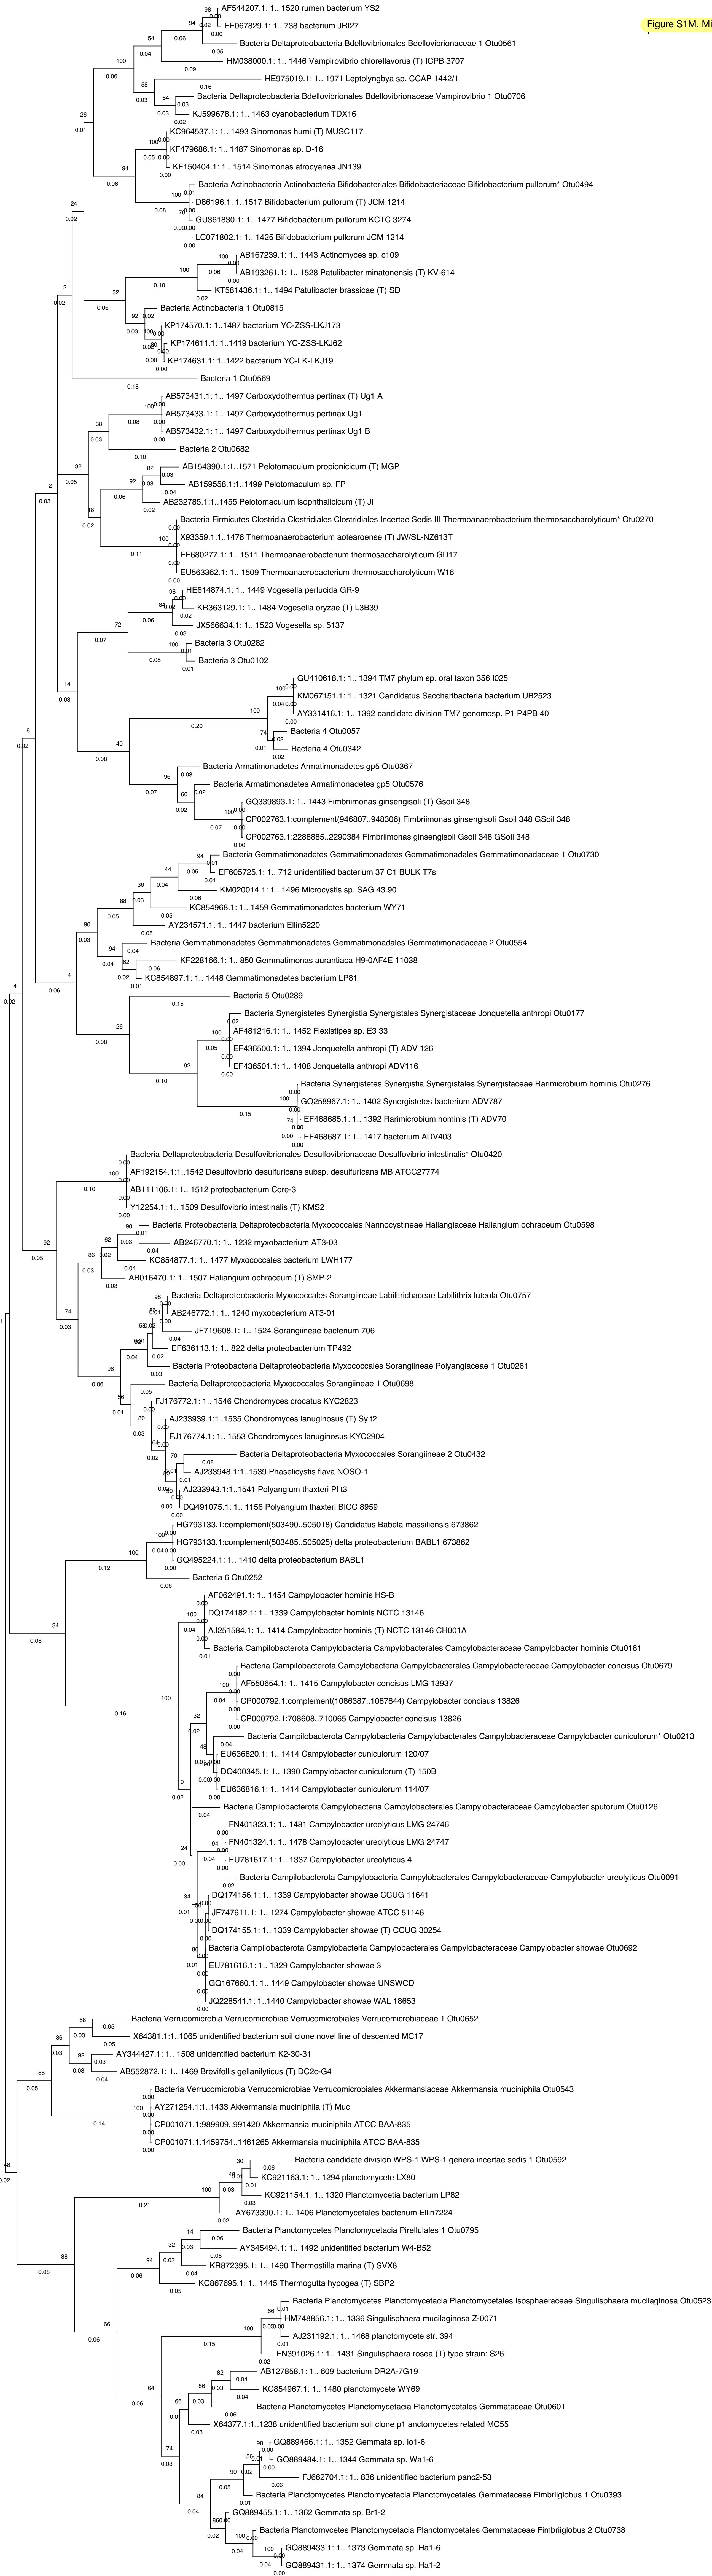





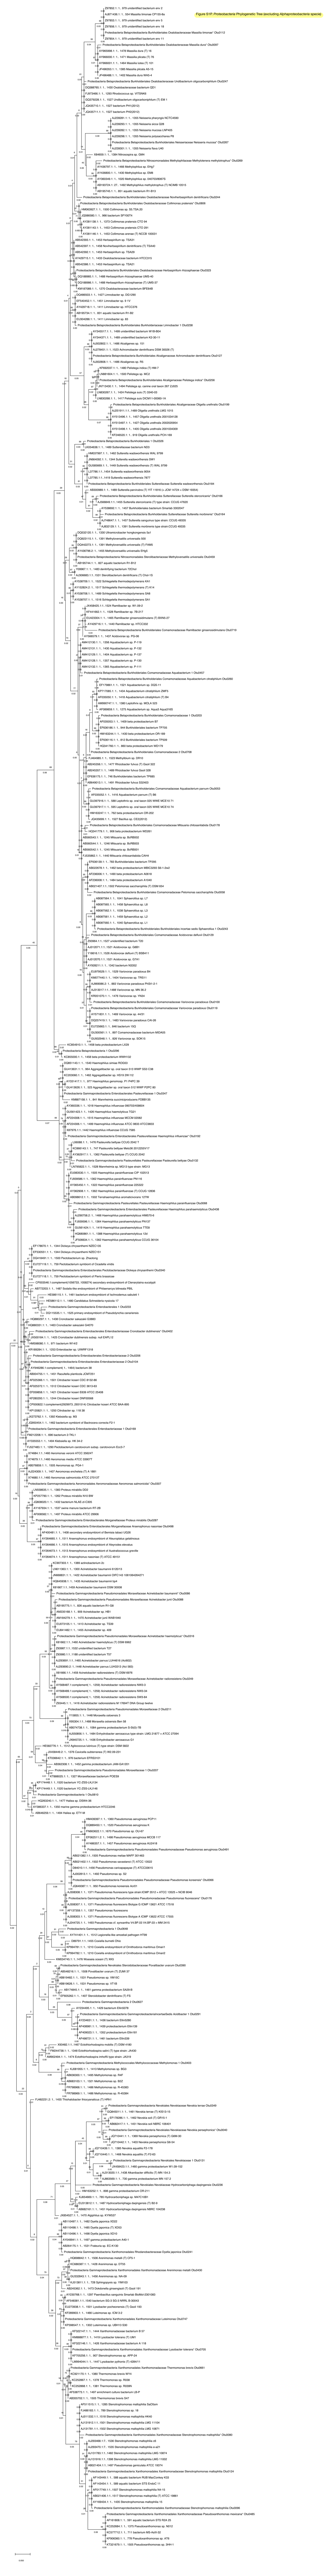

Supplement: S1 Fig — (PDF) [file pone.0272012.s001.pdf]
