# Supplementary material for: Association of key species of vaginal bacteria of recurrent bacterial vaginosis patients before and after oral metronidazole therapy with short- and long-term clinical outcomes
Source: PubMed Central journal article supplement (PMC9333308; doi:10.1371/journal.pone.0272012), 2022-07-28

S3 Figure. Relative pre- and post-treatment abundance of all 96 species and relative pre-treatment abundance of the distributed *Gardnerella* species. Normalized relative abundance per patient was log transformed.

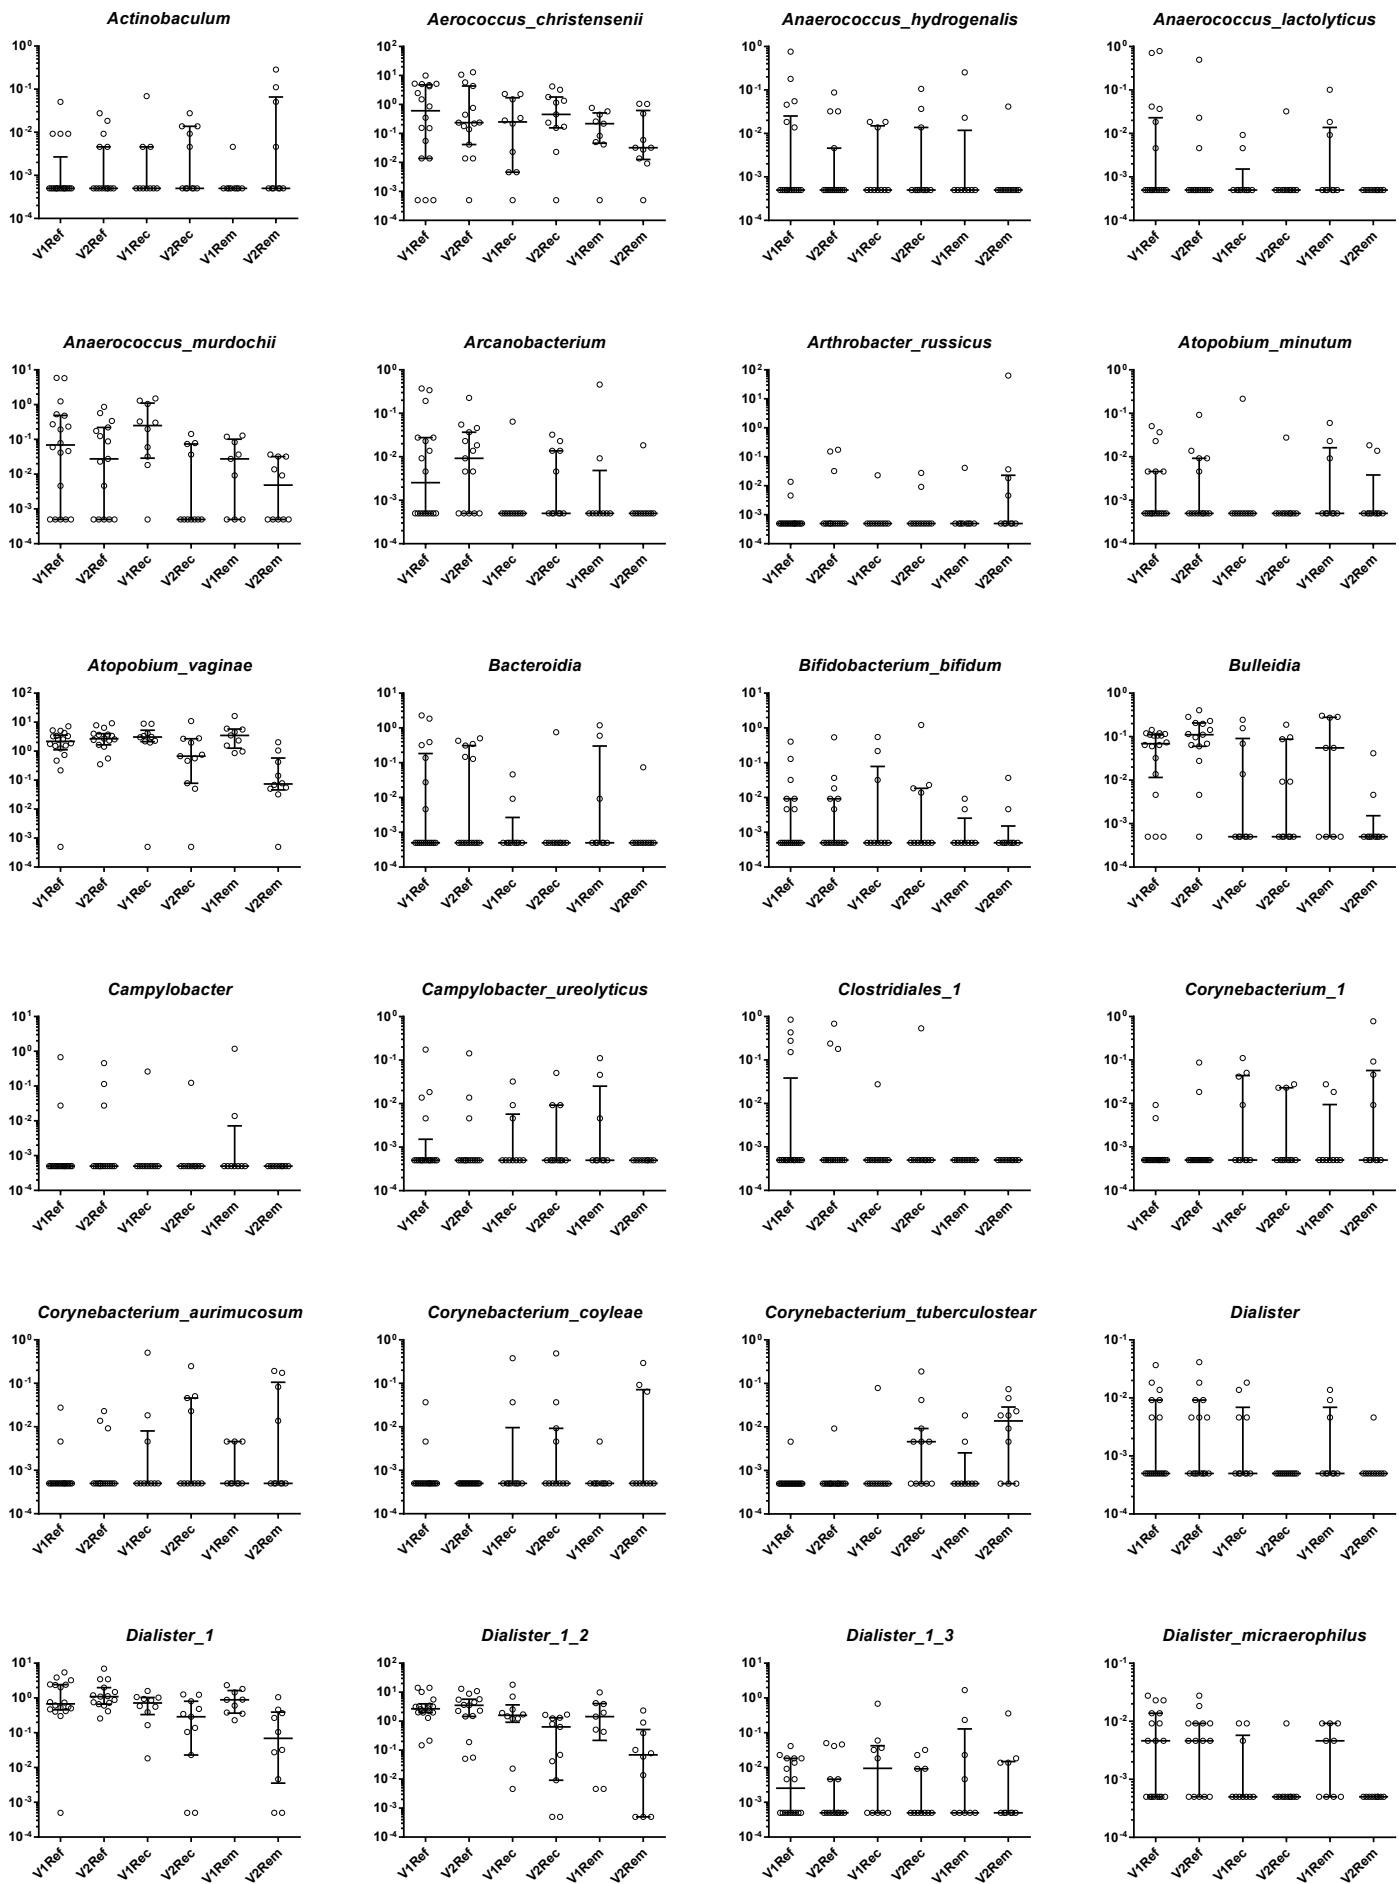

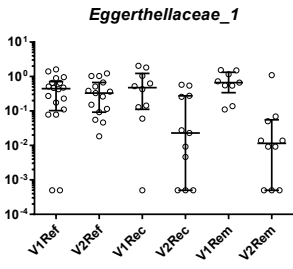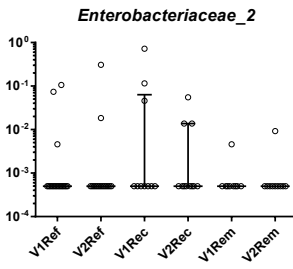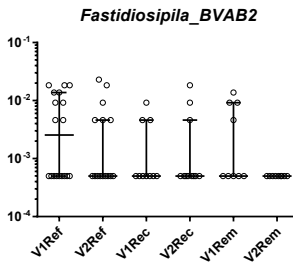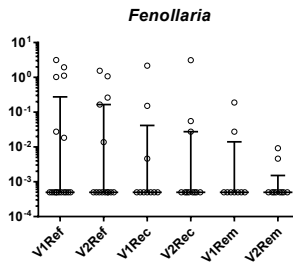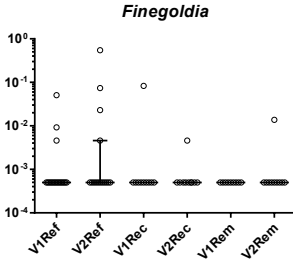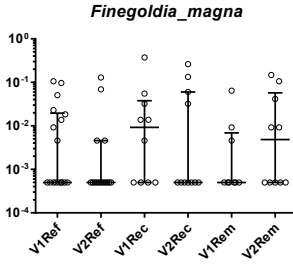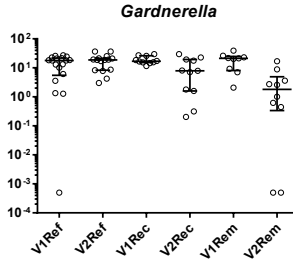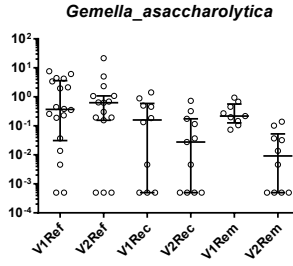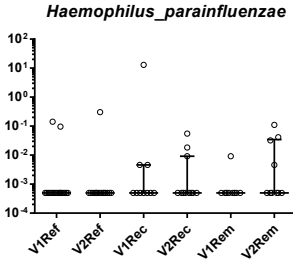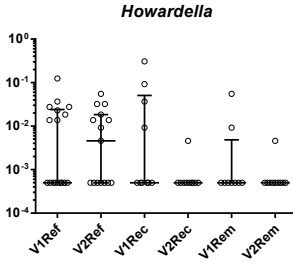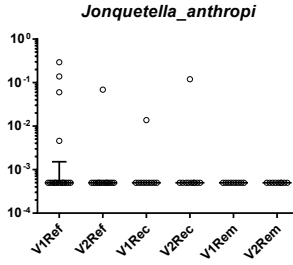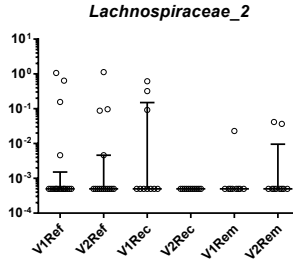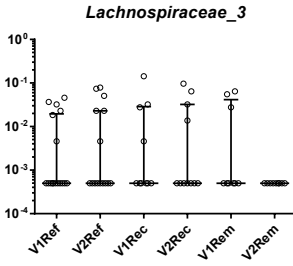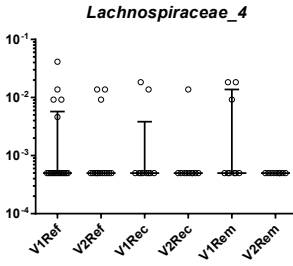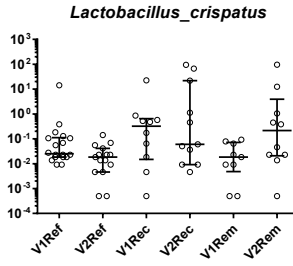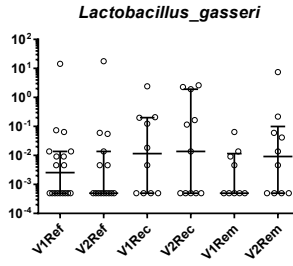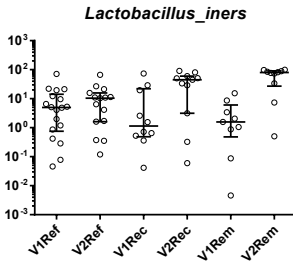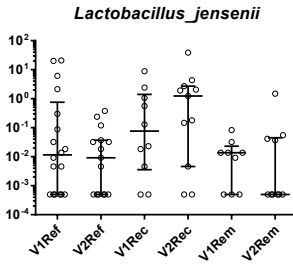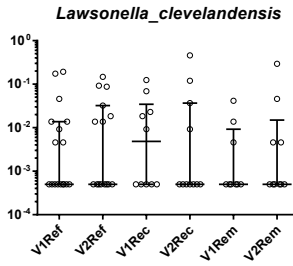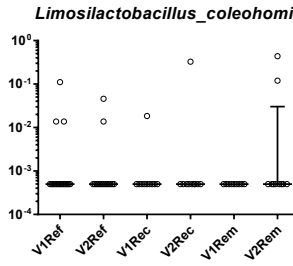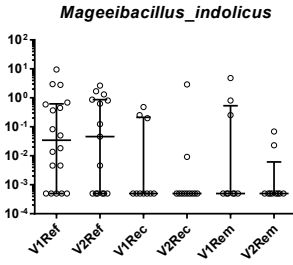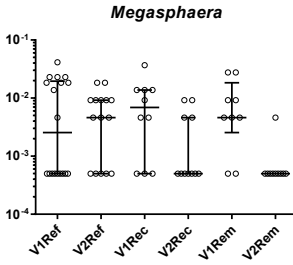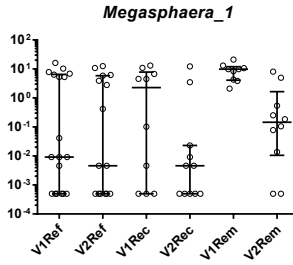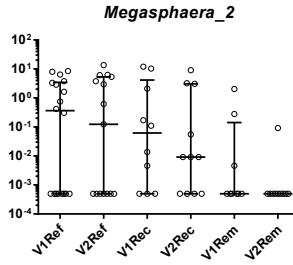



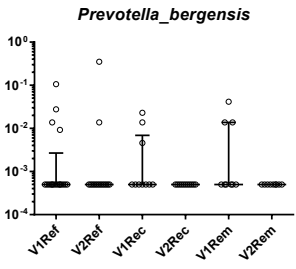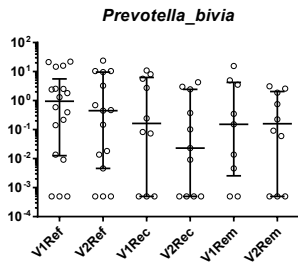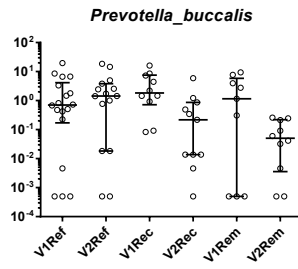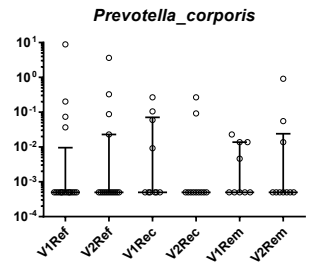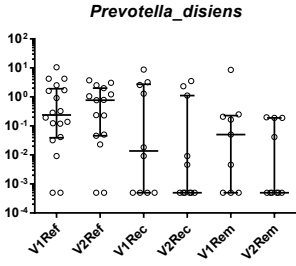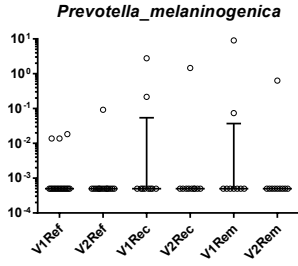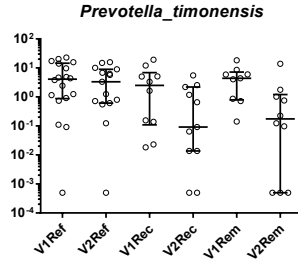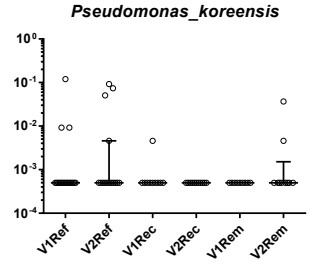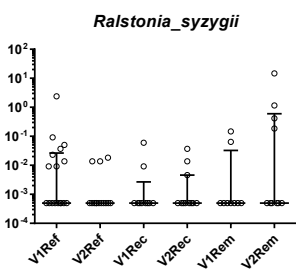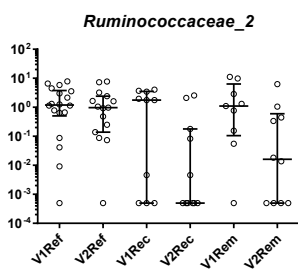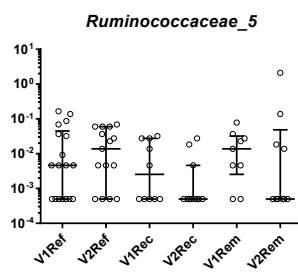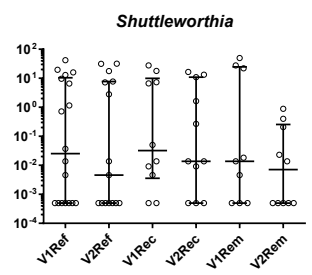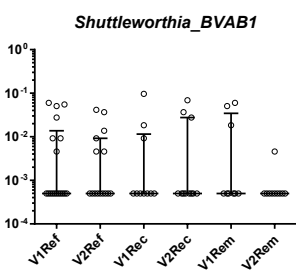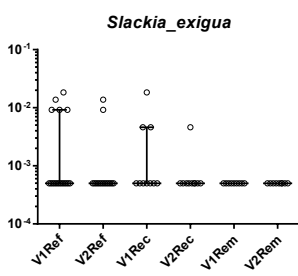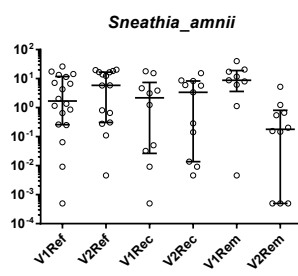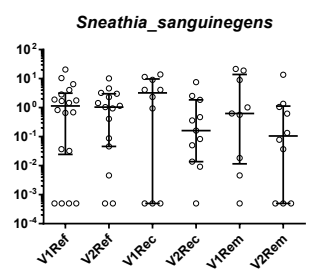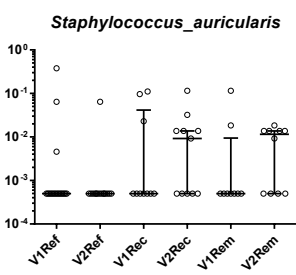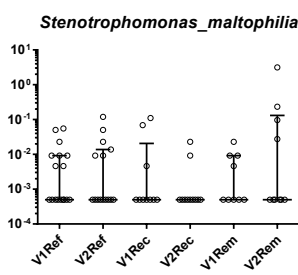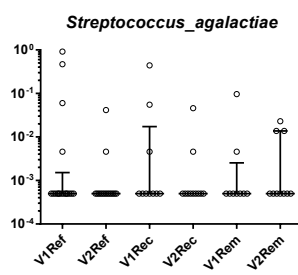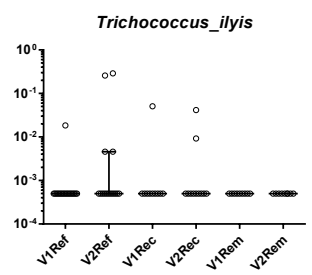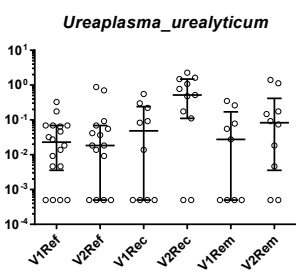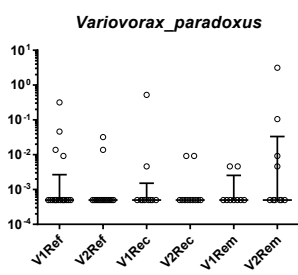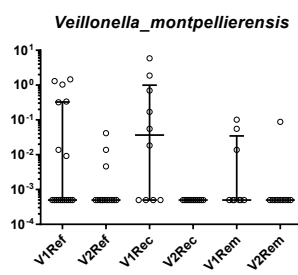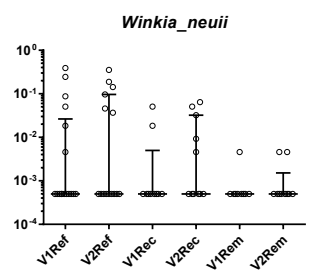

***Gardnerella* Sum**

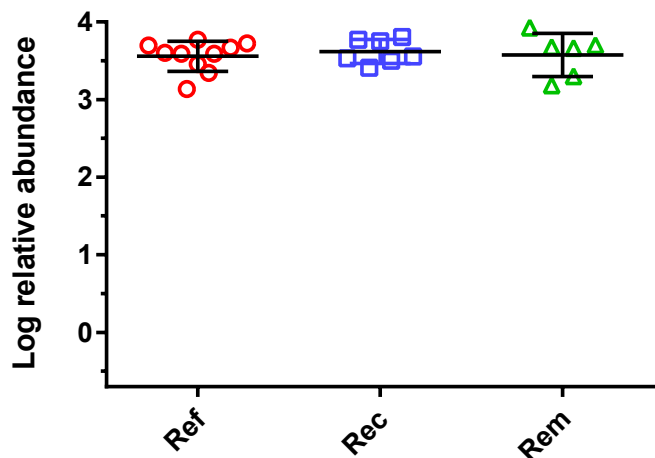

***Gardnerella*\_Gsp.07**

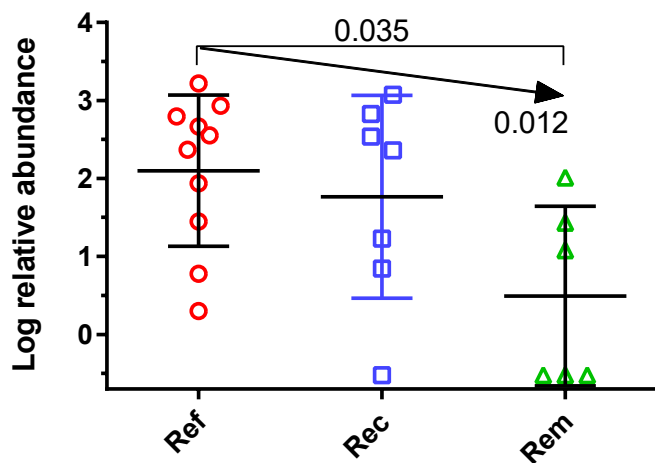

***Gardnerella*\_Gsp01.02**

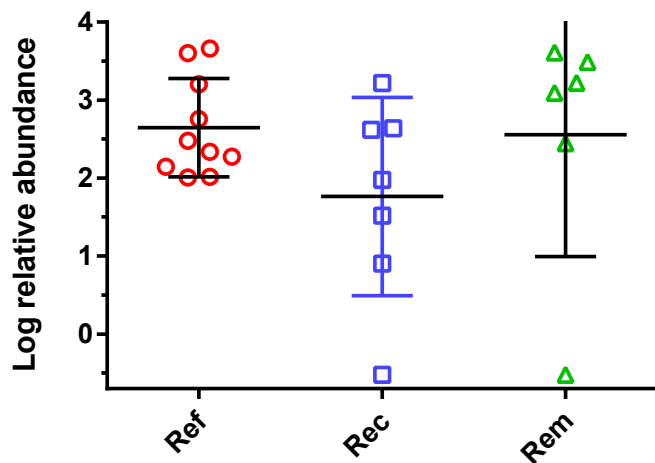

***Gardnerella\_swidsinskii.leopoldii***

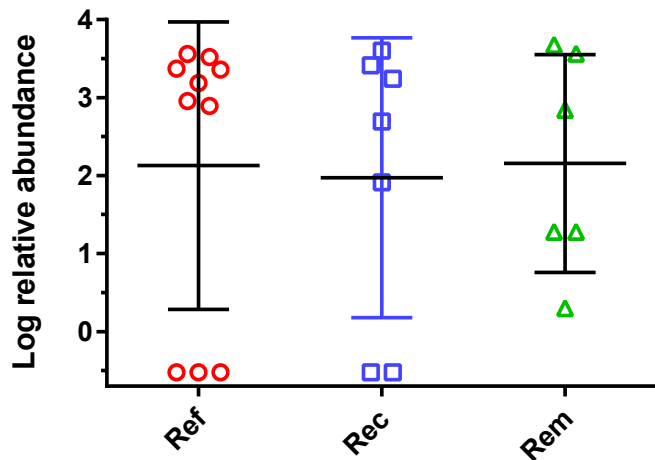

***Gardnerella*\_G.piotii.Gsp03**

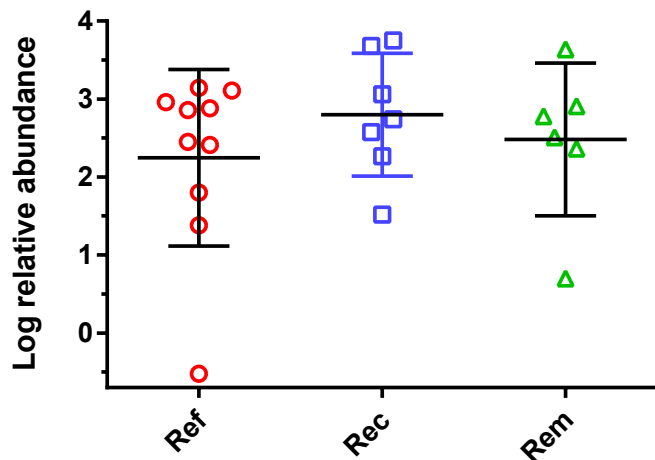

***Gardnerella*\_Gsp08.09.10**

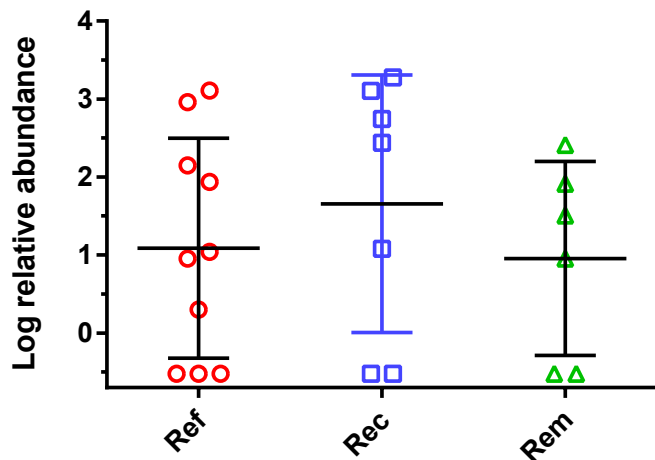

Supplement: pone.0272012.s003.pdf [file pone.0272012.s003.pdf]
